# Supplementary material
Source: Springer Nature journal article supplement (https://www.springermedizin.de/resource/supplementary/12882_2014_869_MOESM4_ESM.pdf/9454476)

(A)

WT1

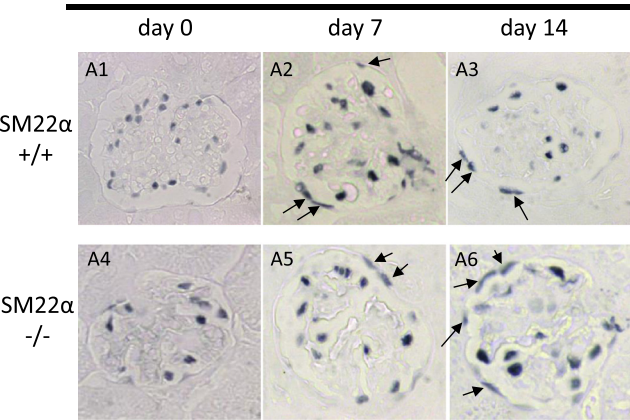

(B)

WT1+ cells/BC length(mm)

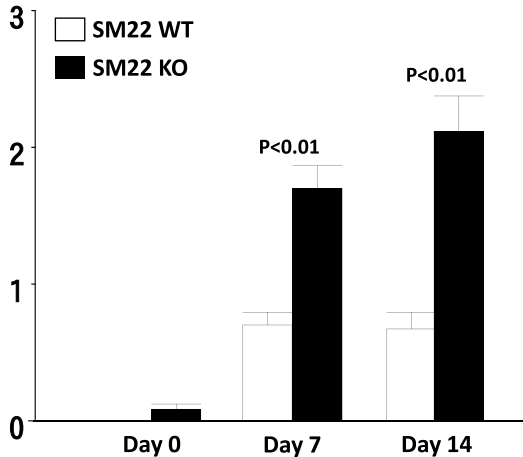

Supplement: MOESM4 [file 9454476]
